# Supplementary material
Source: Springer Nature journal article supplement (https://www.springermedizin.de/resource/supplementary/12879_2011_1667_MOESM2_ESM.pdf/9443044)
Supplement: MOESM2 [file 9443044]

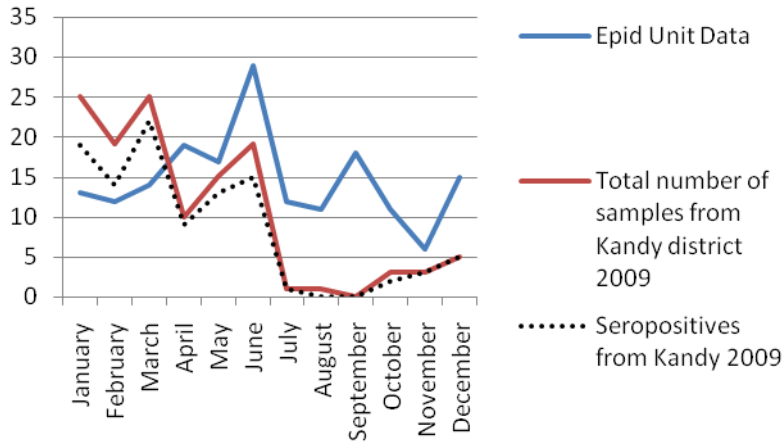

\*Included are samples received for the study from BH Gampola, BH Nawalapitiya, TH Kandy and TH Peradeniya.
